# Supplementary material for: Flood risk assessment for Indian sub-continental river basins
Source: Copernicus journal article supplement (doi:10.5194/hess-28-1107-2024), 2024-03-04
Supplement: Supplementary file 1 [file hess-28-1107-2024-supplement.pdf]

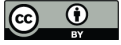

*Supplement of*

## **Flood risk assessment for Indian sub-continental river basins**

**Urmin Vegad et al.**

*Correspondence to:* Vimal Mishra (vmishra@iitgn.ac.in)

The copyright of individual parts of the supplement might differ from the article licence.

**Supplemental Information**

1  
2  
3  
4  
5  
6  
7  
8  
9

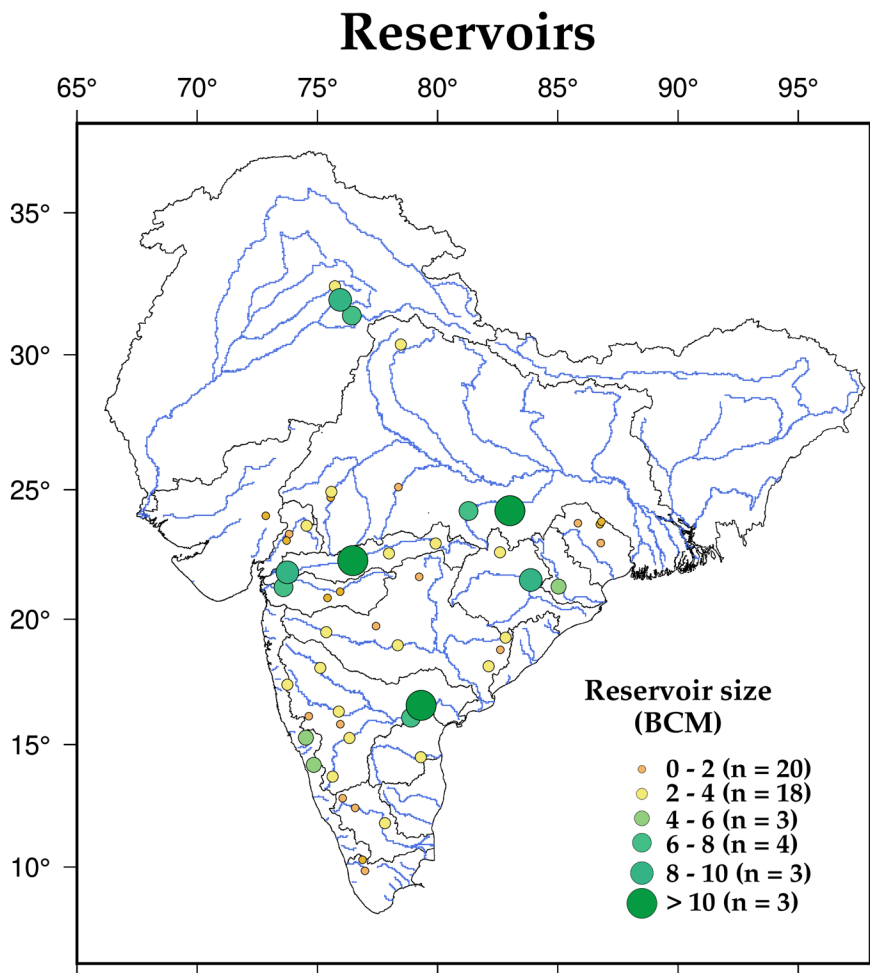

10  
11  
12  
13

**Figure S1. Dams locations and storage capacity in Billion Cubic Meters (BCM)**

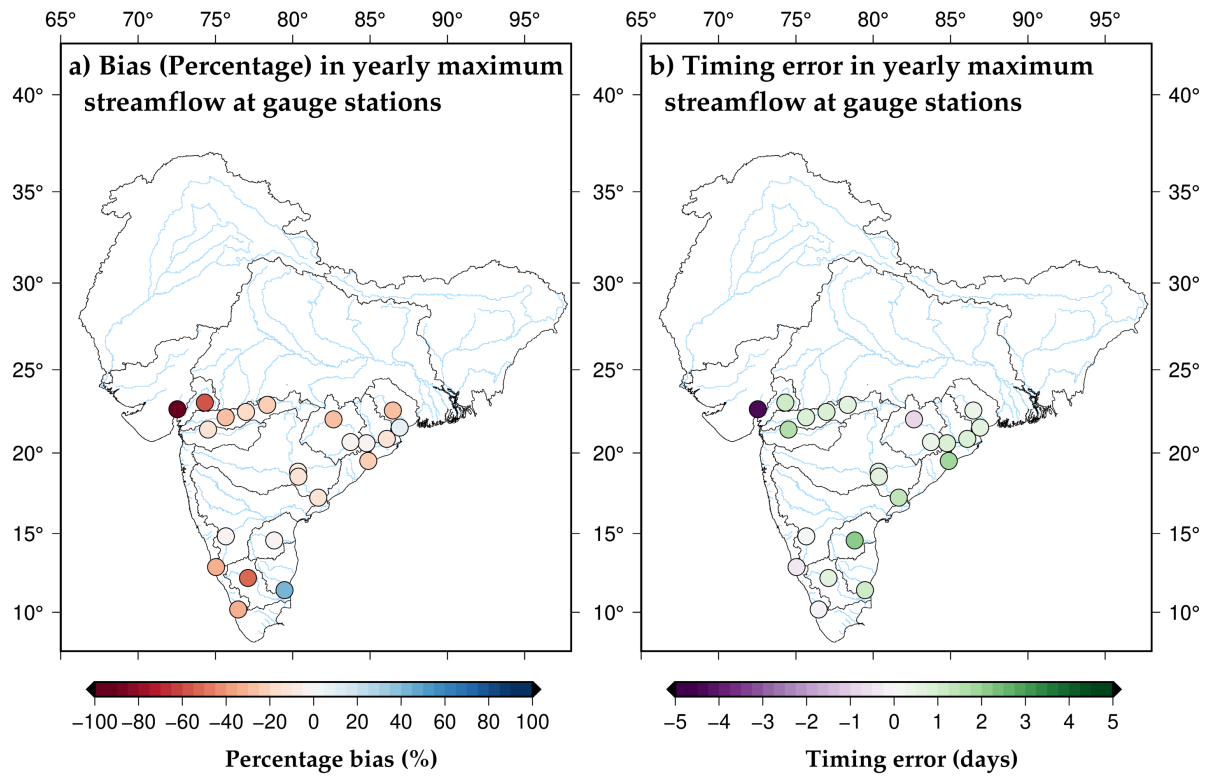

14

15 **Figure S2: a) Bias (percentage) and b) Timing error in the simulation of yearly maximum**  
 16 **streamflow events**

17

18

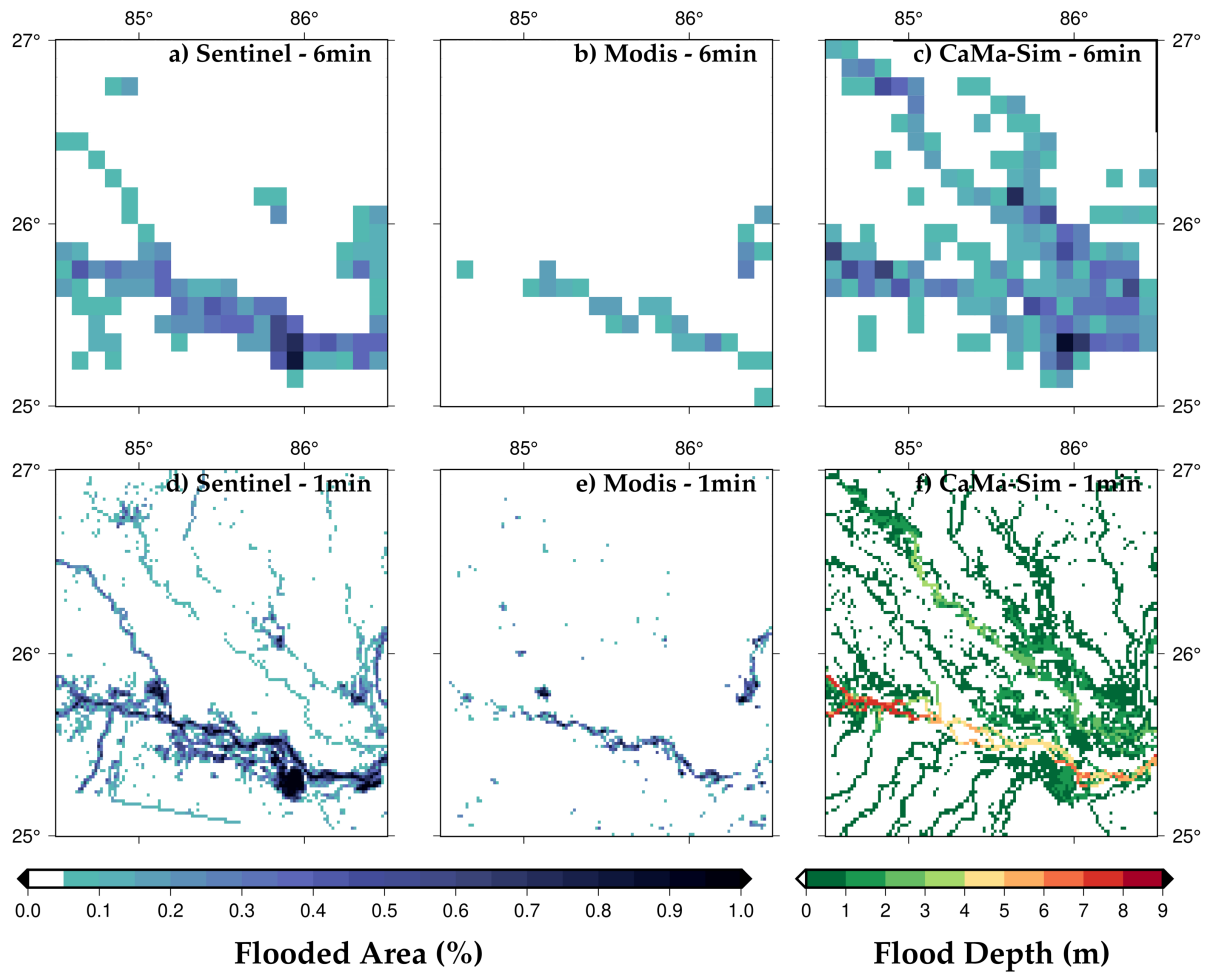

19

20 **Figure S3: Simulated flood extent compared with Sentinel-1 SAR and MODIS satellite-based**  
 21 **observed flood extent for the 2016 flood event in the Ganga river basin**

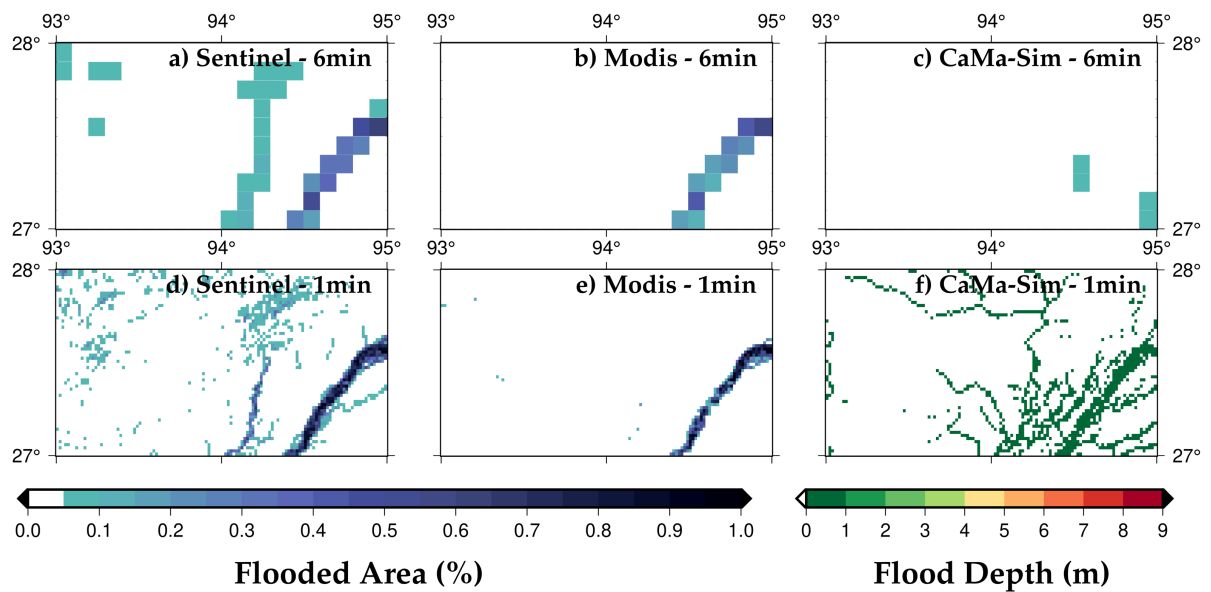

22

23 **Figure S4: Simulated flood extent compared with Sentinel-1 SAR and MODIS satellite-based**  
 24 **observed flood extent for the 2019 flood event in the Brahmaputra river basin**

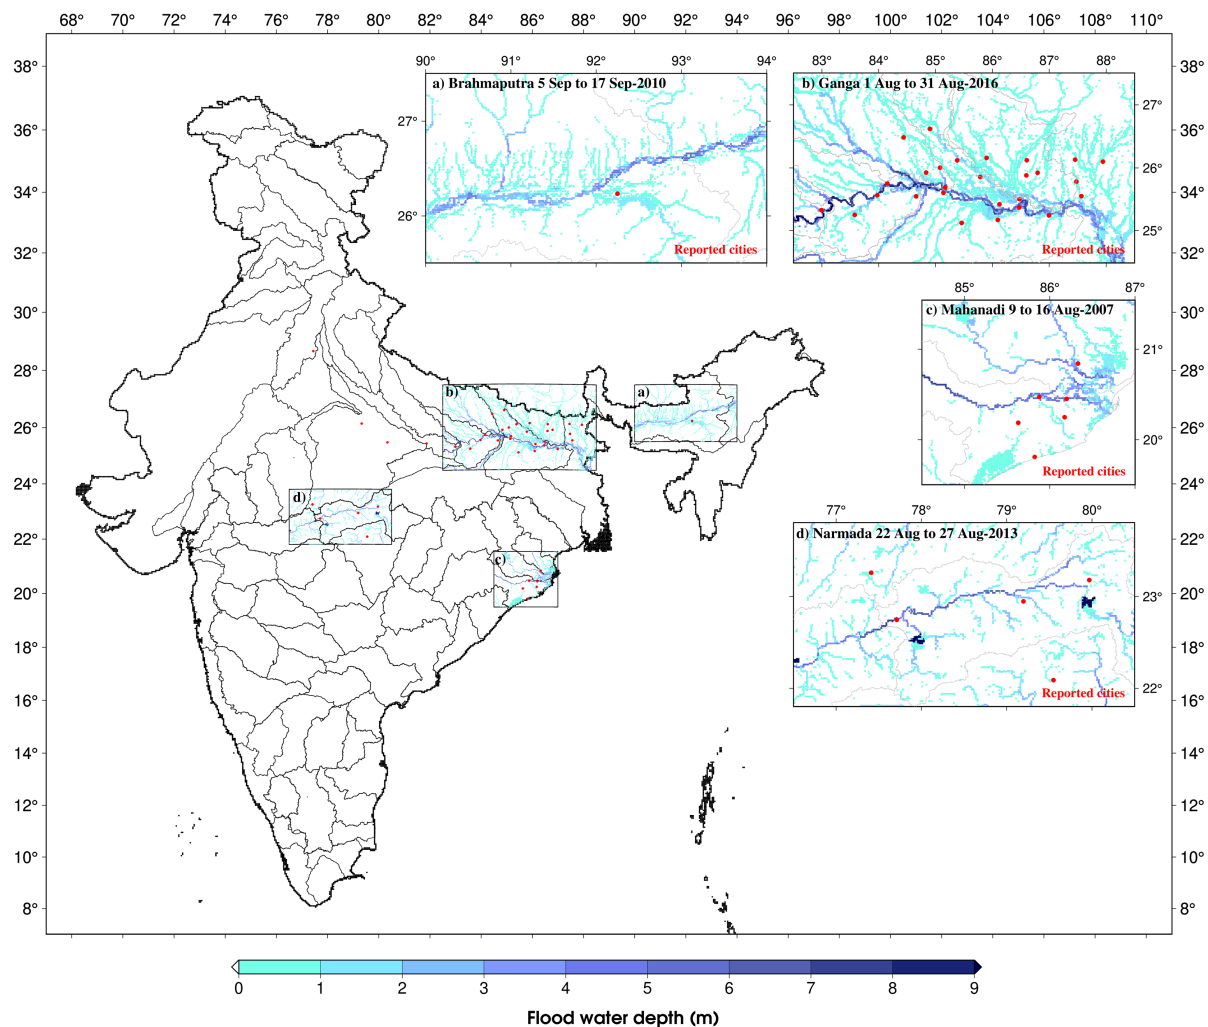

26

27 **Figure S5. Simulated flood occurrence compared with reported flood cities from EMDAT**  
28 **and/or DFO (a) Brahmaputra River basin 5 September 2010 to 17 September 2010 (b) Ganga**  
29 **River basin 1 August 2016 to 31 August 2016 (c) Mahanadi River basin 9 August 2007 to 16**  
30 **August 2007 (d) Narmada River basin 22 August 2013 to 27 August 2013**

31

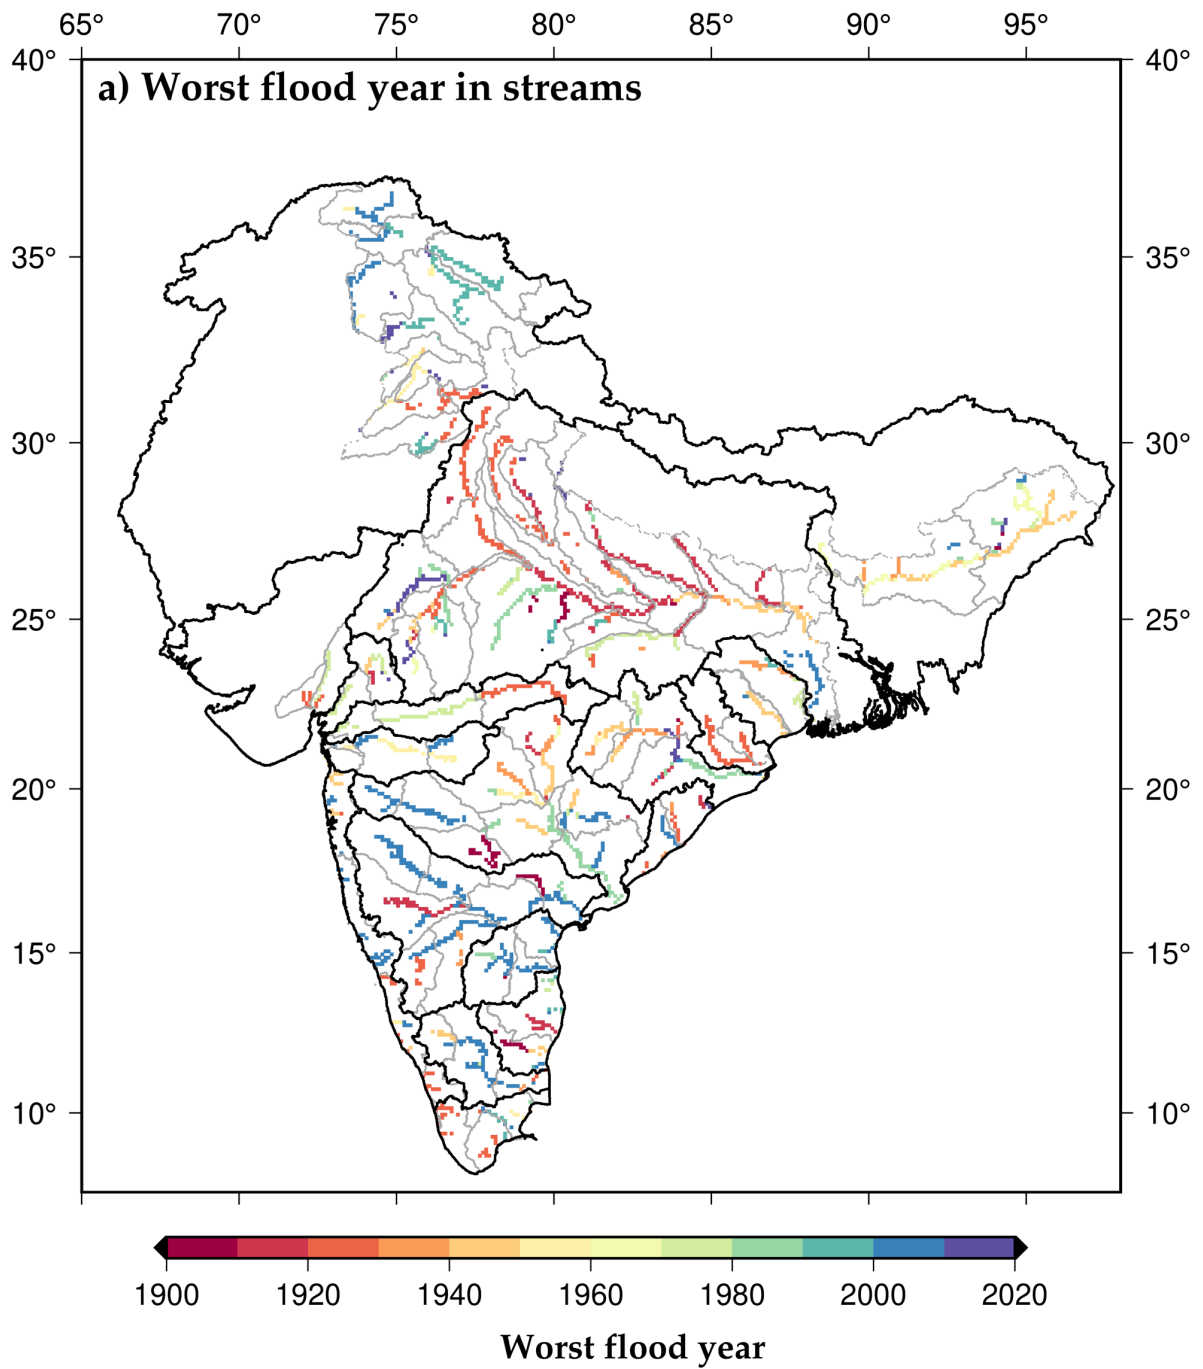

32

33 **Figure S6. Heat map illustrating worst flood year in different streams**

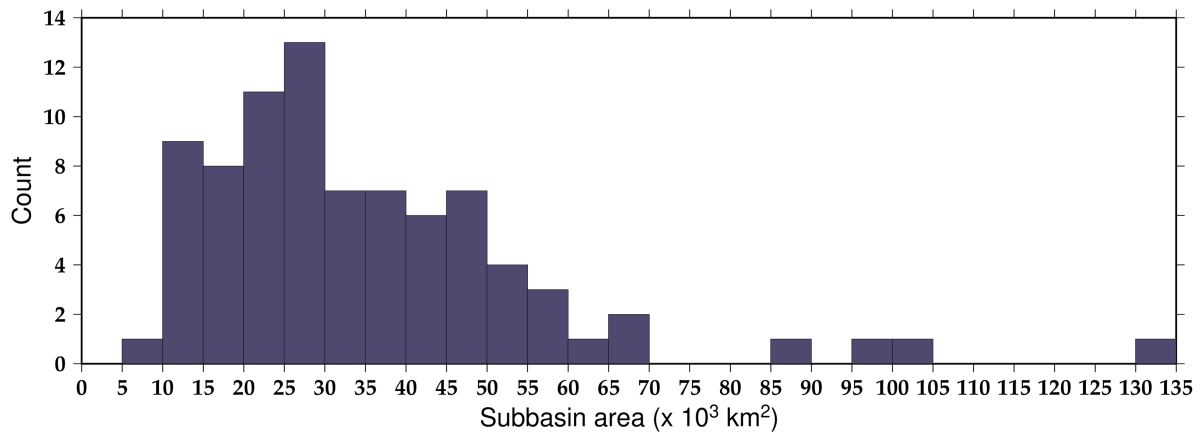

34

35 **Figure S7. Histogram of subbasin area showing the number of subbasin falling in each interval.**

36

37

38

39

40

41 **Table S1 - Dams location, storage capacity and purpose details (Purpose Abbreviation: I-**  
 42 **irrigation, H-hydropower, S-water supply, F-fish production, C-flood control, O-other benefits,**  
 43 **T-tourism, N-navigation)**

44

| Sr No | Basin      | Dam            | Lat     | Long    | Total storage (BCM) | Live storage (BCM) | Purpose       |
|-------|------------|----------------|---------|---------|---------------------|--------------------|---------------|
| 1     | Narmada    | Indira Sagar   | 22.2846 | 76.4721 | 12.22               | 9.75               | I/H           |
| 2     | Krishna    | Nagarjun Sagar | 16.5761 | 79.3135 | 11.55               | 6.92               | I/H           |
| 3     | Ganga      | Rihand         | 24.2028 | 83.0057 | 10.6                | 8.9                | I/H           |
| 4     | Indus      | Pong           | 31.9662 | 75.9456 | 9.621               | 7.29               | I/H/C         |
| 5     | Narmada    | Sardar Sarovar | 21.8305 | 73.7501 | 9.5                 | 5.8                | I/H/N/S/C/F/O |
| 6     | Mahanadi   | Hirakud        | 21.5338 | 83.8751 | 8.136               | 5.818              | I/H/S/D/T/C   |
| 7     | Indus      | Bhakra         | 31.4107 | 76.4331 | 7.551               | 6.007              | I/H/T/C/F     |
| 8     | Tapi       | Ukai           | 21.2504 | 73.5913 | 7.41429             | 6.729896           | I/H/C         |
| 9     | Ganga      | Bansagar       | 24.1902 | 81.2862 | 6.37                | 5.43               | I/H/S         |
| 10    | Krishna    | Srisaillam     | 16.0867 | 78.8971 | 6.11643<br>8863     | 5.8332703<br>98    | H             |
| 11    | Brahmani   | Rengali        | 21.2765 | 85.034  | 5.15                | 3.41371            | I/H/C         |
| 12    | West Coast | Linganamakki   | 14.1756 | 74.8466 | 4.43535             | 4.29394            | H             |
| 13    | West Coast | Supa           | 15.2759 | 74.5265 | 4.178               | 4.115              | H             |
| 14    | Narmada    | Bargi          | 22.9416 | 79.9236 | 3.92                | 3.18               | I/H/S         |
| 15    | Krishna    | Tungabhadra    | 15.2639 | 76.333  | 3.73782<br>375      | 3.3085403<br>56    | I/H/S/D/T/F   |
| 16    | Godavari   | Balimela       | 18.1411 | 82.1215 | 3.61                | 2.6759             | I/H           |
| 17    | Ganga      | Tehri          | 30.37   | 78.47   | 3.54                | 2.615              | I/H           |
| 18    | Krishna    | Almatti        | 16.3309 | 75.8868 | 3.48523<br>7478     | 2.9854451<br>36    | I/H           |
| 19    | Mahanadi   | Bango          | 22.6052 | 82.5979 | 3.416               | 2.894              | I/H           |
| 20    | Krishna    | Ujjaini        | 18.0743 | 75.1198 | 3.32001             | 1.5172             | I/S           |



|    |              |                   |         |         |              |          |                       |
|----|--------------|-------------------|---------|---------|--------------|----------|-----------------------|
| 21 | Indus        | Thein             | 32.4439 | 75.7304 | 3.28         | 2.344    | I/H/C                 |
| 22 | Godavari     | Sriram Sagar      | 18.9685 | 78.3414 | 3.172        | 2.322    | I/H/S                 |
| 23 | Ganga        | Ramganga          | 29.5153 | 78.7561 | 6.14         | 5.34     | I                     |
| 24 | Godavari     | Jayakwadi Stage 1 | 19.4849 | 75.3705 | 2.909        | 2.17093  | I/H                   |
| 25 | Ganga        | Ranapratap Sagar  | 24.9176 | 75.5839 | 2.89869      | 1.56653  | I/H/S                 |
| 26 | Cauvery      | Mettur            | 11.8013 | 77.8089 | 2.70876<br>4 | 2.647    | I/H/D/T               |
| 27 | Narmada      | Tawa              | 22.5626 | 77.977  | 2.31154<br>2 | 1.943965 | I                     |
| 28 | Godavari     | Upper Indrawati   | 19.2742 | 82.8294 | 2.3          | 1.5      | I/H                   |
| 29 | Pennar       | Somasila          | 14.489  | 79.3046 | 2.20837      | 1.9941   | I/H                   |
| 30 | Mahi         | Mahi              | 23.6285 | 74.5471 | 2.18037<br>6 | 1.8335   | I/H/S/O               |
| 31 | Krishna      | Bhadra            | 13.7011 | 75.6363 | 2.02587      | 1.785    | I/H/S                 |
| 32 | South Coast  | Idukki            | 9.8429  | 76.9761 | 1.9963       | 1.45951  | I/H/S/C               |
| 33 | Mahi         | Kadana            | 23.3057 | 73.8253 | 1.542        | 1.203    | I/H/F                 |
| 34 | Krishna      | Hidkal            | 16.1425 | 74.6425 | 1.44869      | 1.32183  | I/H/S                 |
| 35 | Cauvery      | Krishnaraja Sagar | 12.4253 | 76.5723 | 1.4          | 1.27569  | I                     |
| 36 | Godavari     | Isapur            | 19.7271 | 77.4359 | 1.279        | 0.964    | I                     |
| 37 | Godavari     | Upper Kolab       | 18.7928 | 82.6079 | 1.215        | 0.935    | I/H/S                 |
| 38 | Godavari     | Totladoh          | 21.6587 | 79.2319 | 1.16693      | 1.01693  | H                     |
| 39 | Ganga        | Matatila          | 25.0978 | 78.3728 | 1.132        | 1.0194   | I/H                   |
| 40 | Krishna      | Malaprabha        | 15.8166 | 75.9533 | 1.068        | 0.83025  | I/H/N/S/D/T/C/<br>F/O |
| 41 | Cauvery      | Hemavathy         | 12.8219 | 76.0544 | 1.05063      | 1.01261  | I/H/S/D/T/F/O         |
| 42 | Subernarekha | Kangsabati        | 22.9636 | 86.789  | 1.04         | 0.9004   | I                     |
| 43 | Subernarekha | Tenughat          | 23.7252 | 85.8361 | 1.0209       | 0.99992  | I/H                   |

|    |              |             |         |         |         |          |           |
|----|--------------|-------------|---------|---------|---------|----------|-----------|
| 44 | Sabarmati    | Dharoi      | 24.0045 | 72.8539 | 0.90788 | 0.13199  | I/S       |
| 45 | Mahi         | Panam       | 23.0542 | 73.7167 | 0.7376  | 0.69884  | I/H/S/F   |
| 46 | Tapi         | Girna       | 20.8329 | 75.4237 | 0.60845 | 0.52355  | I/H       |
| 47 | Subernarekha | Maithon     | 23.7851 | 86.8119 | 0.534   | 0.441    | I/H/S/T/C |
| 48 | Tapi         | Hatnur      | 21.0735 | 75.9454 | 0.388   | 0.255    | I         |
| 49 | Subernarekha | Panchet     | 23.6808 | 86.7471 | 0.275   | 0.169    | I/H/S/C   |
| 50 | South Coast  | Sholayar    | 10.2979 | 76.8804 | 0.16    | 0.1525   | I/H       |
| 51 | Ganga        | Gandhisagar | 24.7008 | 75.5523 | 0.07322 | 0.067974 | I/H       |

45

46

47 **Table S2 - Critical parameters value corresponding to each basin used in the evaluation of the**

48 **H08 model.**

| Sr No. | Basin            | Sd      | Cd           | Gamma | Tau      |
|--------|------------------|---------|--------------|-------|----------|
|        | (Range) >        | (0.5-5) | (0.001-0.01) | (1-4) | (30-300) |
| 1      | Brahmani         | 1.7     | 0.004        | 2.8   | 105      |
| 2      | Brahmputra       | 2.1     | 0.001        | 2.1   | 155      |
| 3      | Cauvery          | 1.2     | 0.0025       | 2.1   | 105      |
| 4      | East Coast       | 2.2     | 0.005        | 2.8   | 70       |
| 5      | Ganga            | 2.1     | 0.002        | 3.6   | 105      |
| 6      | Godavari         | 2.8     | 0.003        | 2.8   | 105      |
| 7      | Indus            | 1       | 0.00075      | 1.0   | 155      |
| 8      | Krishna          | 1.7     | 0.0035       | 1.5   | 155      |
| 9      | Mahanadi         | 2.8     | 0.002        | 2.8   | 105      |
| 10     | Mahi             | 2.6     | 0.004        | 2.1   | 105      |
| 11     | Narmada          | 2.3     | 0.004        | 2.8   | 70       |
| 12     | North East Coast | 2.85    | 0.004        | 3.6   | 155      |
| 13     | Pennar           | 1.65    | 0.0035       | 2.1   | 120      |
| 14     | Sabarmati        | 3.2     | 0.004        | 3.6   | 70       |
| 15     | South Coast      | 0.5     | 0.001        | 2.1   | 70       |
| 16     | Subernarekha     | 2.2     | 0.002        | 2.8   | 70       |
| 17     | Tapi             | 2.1     | 0.002        | 3.6   | 155      |
| 18     | West Coast       | 1       | 0.001        | 3.6   | 70       |

49
